# Supplementary material for: Sciellin mediates mesenchymal-to-epithelial transition in colorectal cancer hepatic metastasis
Source: PubMed Central journal article supplement (PMC5041940; doi:10.18632/oncotarget.8264), 2016-03-22
Supplement: oncotarget-07-25742-s001.pdf [file oncotarget-07-25742-s001.pdf]

SUPPLEMENTARY MATERIALS

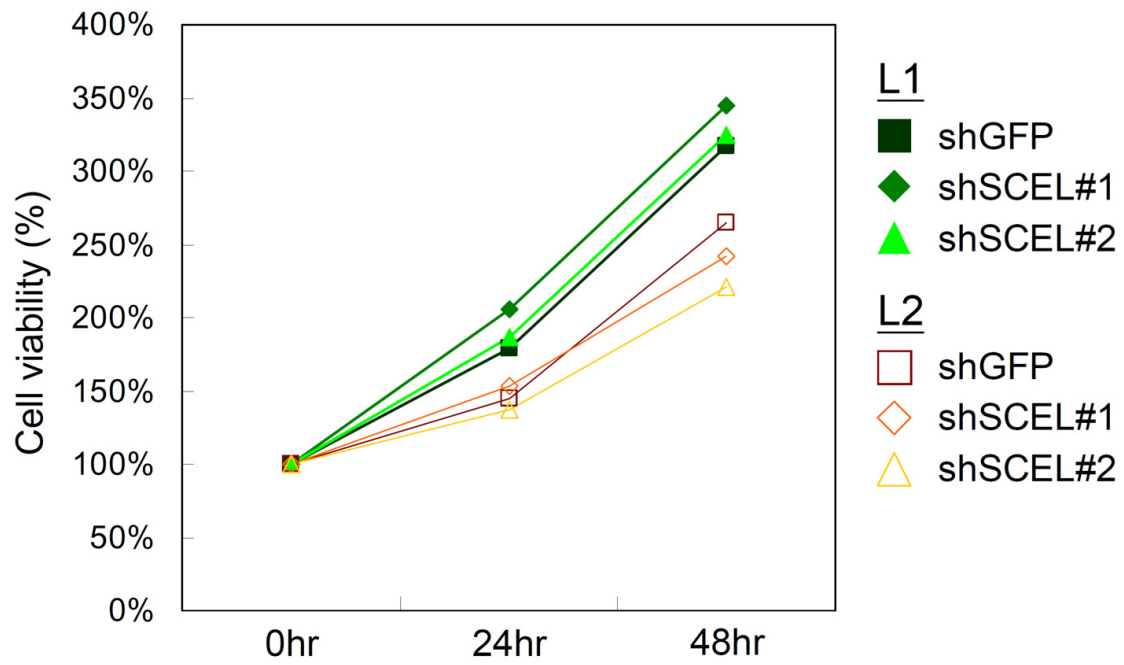

Supplementary Figure S1: Growth curve of L1 and L2 with shGFP (control) or shSCEL treatment.

Supplementary Table S1: The list of SCEL binding proteins

| UniPort | Protein name                                                 | Gene name | MW [kDa] | Unique peptie |
|---------|--------------------------------------------------------------|-----------|----------|---------------|
| P62937  | Peptidyl-prolyl cis-trans isomerase A                        | PPIA      | 18.01    | 5             |
| P51571  | Translocon-associated protein subunit delta                  | SSR4      | 20.21    | 4             |
| Q14764  | Major vault protein                                          | MVP       | 99.33    | 4             |
| Q99623  | Prohibitin-2                                                 | PHB2      | 33.30    | 4             |
| O75955  | Flotillin-1                                                  | FLOT1     | 47.36    | 3             |
| Q96S97  | Myeloid-associated differentiation marker                    | MYADM     | 35.27    | 2             |
| P83881  | 60S ribosomal protein L36a                                   | RPL36A    | 17.73    | 3             |
| Q9HCY8  | Protein S100-A14                                             | S100A14   | 11.66    | 4             |
| O14818  | Proteasome subunit alpha type-7                              | PSMA7     | 27.89    | 3             |
| O60762  | Dolichol-phosphate mannosyltransferase                       | DPM1      | 33.35    | 4             |
| O00161  | Synaptosomal-associated protein 23                           | SNAP23    | 23.35    | 2             |
| O15145  | Actin-related protein 2/3 complex subunit 3                  | ARPC3     | 20.55    | 2             |
| Q06830  | Peroxiredoxin-1                                              | PRDX1     | 22.11    | 2             |
| Q9UQB8  | Brain-specific angiogenesis inhibitor 1-associated protein 2 | BAIAP2    | 60.87    | 3             |
| Q9H936  | Mitochondrial glutamate carrier 1                            | SLC25A22  | 34.47    | 4             |
| P49720  | Proteasome subunit beta type-3                               | PSMB3     | 22.95    | 2             |
| P60900  | Proteasome subunit alpha type-6                              | PSMA6     | 28.15    | 3             |
| Q8NC51  | Plasminogen activator inhibitor 1 RNA-binding protein        | SERBP1    | 43.14    | 4             |
| P00367  | Glutamate dehydrogenase 1, mitochondrial                     | GLUD1     | 61.40    | 2             |
| P06733  | Alpha-enolase                                                | ENO1      | 47.17    | 2             |
| Q9Y230  | RuvB-like 2                                                  | RUVBL2    | 51.16    | 3             |
